# Supplementary material
Source: PubMed Central journal article supplement (PMC11028235)
Supplement: 262_2018_2184_MOESM1_ESM.pdf [file 262_2018_2184_MOESM1_ESM.pdf]

**Supplementary Table S1. RT-PCR primer pairs**

| mRNA                           | Forward and Reverse Primers                           |
|--------------------------------|-------------------------------------------------------|
| <i>Arg</i>                     | F: TACAAGACAGGGCTCCTTTTCAG<br>R: TGAGTTCCGAAGCAAGCCAA |
| <i>Ccl17</i>                   | F: CGAGAGTGCTGCCTGGATTA<br>R: CCTGGACAGTCAGAAACACGAT  |
| <i>Ccl22</i>                   | F: GCCAGGACTACATCCGTCAC<br>R: TGACGGTTATCAAAACAACGCC  |
| <i>Cyclophilin A</i>           | F: GAGCTGTTTGCAGACAAAGTTC<br>R: CCCTGGCACATGAATCCTGG  |
| <i>Fizz1</i>                   | F: TGCCAATCCAGCTAACTATCCC<br>R: ACGAGTAAGCACAGGCAGTT  |
| <i>IL-1<math>\beta</math></i>  | F: GCAGAGTTCCCAACTGGTA<br>R: GGTTTCTTGTGACCCTGAGC     |
| <i>IL-6</i>                    | F: AGTCCGGAGAGGAGACTTCA<br>R: TTGCCATTGCACAACTCTTT    |
| <i>IL-10</i>                   | F: GCCGGAAGACAATAACTGC<br>R: GGCAACCCAAGTAACCCTTAAA   |
| <i>IL-12<math>\beta</math></i> | F: GGAGGGGTGTAACCAGAAAGG<br>R: GAGCTTGCACGCAGACATTC   |
| <i>Mmp9</i>                    | F: GTCCAGACCAAGGGTACAGC<br>R: ATACAGCGGGTACATGAGCG    |
| <i>MR</i>                      | F: TTCAGCTATTGGACGCGAGG<br>R: GAATCTGACACCCAGCGGAA    |
| <i>Nos2</i>                    | F: AGACCTCAACAGAGCCCTCA<br>R: TCGAAGGTGAGCTGAACGAG    |
| <i>Nfkb1 (p50) ex4-6</i>       | F: GAACACTGCTTTGACTCACTC<br>R: CTTCACACACATAGCGGAATC  |
| <i>Tgf<math>\beta</math></i>   | F: GTCACTGGAGTTGTACGGCA<br>R: GGGCTGATCCCGTTGATTTC    |
| <i>Tnf<math>\alpha</math></i>  | F: CCAAAGGGATGAGAAGTTCC<br>R: CTCCACTTGGTGGTTTGCTA    |

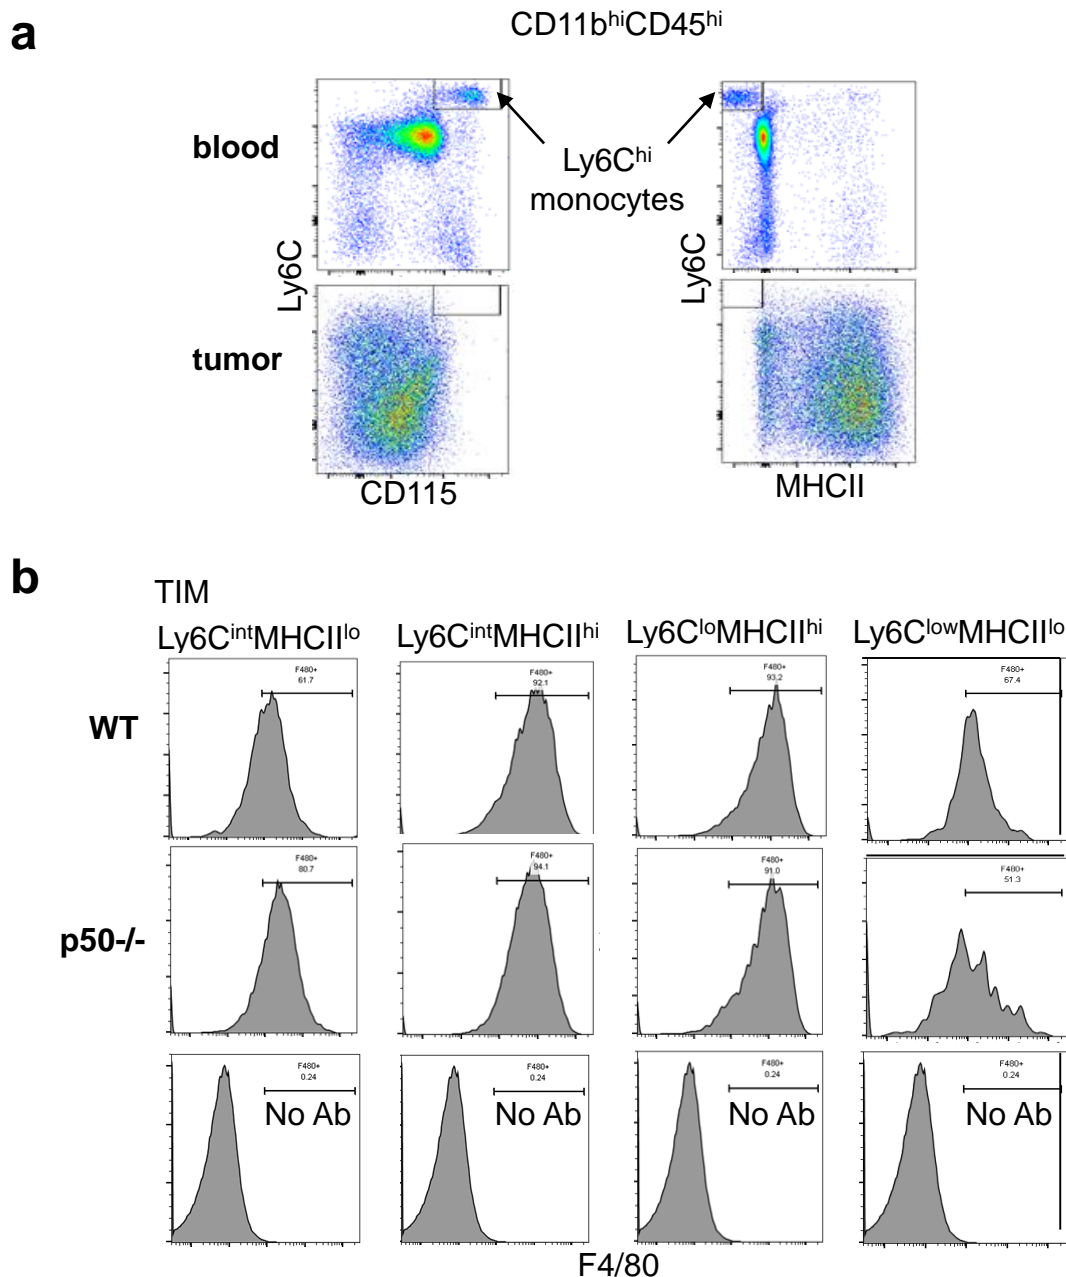

**Supplementary Fig. S1** Comparison of Ly6C expression on blood monocytes vs TIMs, and F4/80 expression in TIM subsets. **a** Blood mononuclear cells and tumor CD45<sup>hi</sup>CD11b<sup>hi</sup> TIMs from WT mice were evaluated by FC for Ly6C;CD115 and Ly6C;MHCII expression. Note that blood monocytes, but not glioma TIMs, express high levels of Ly6C. **b** F4/80 was evaluated in the four TIM Ly6C;MHCII subsets.

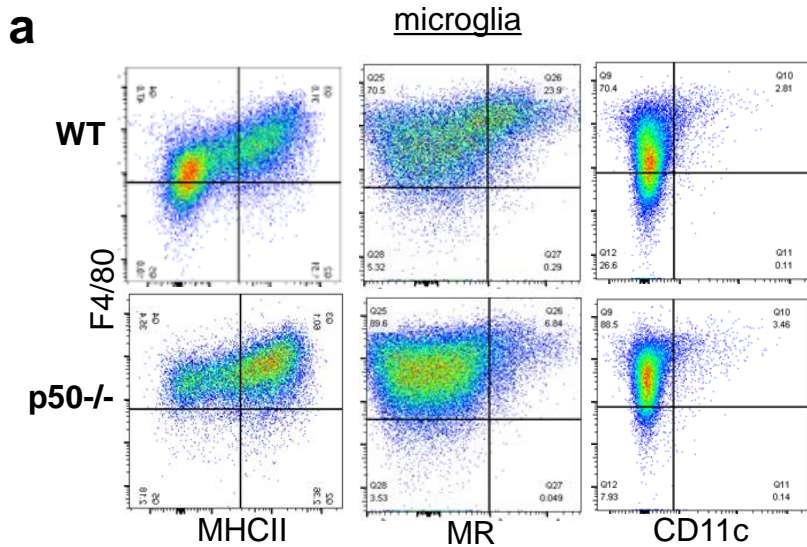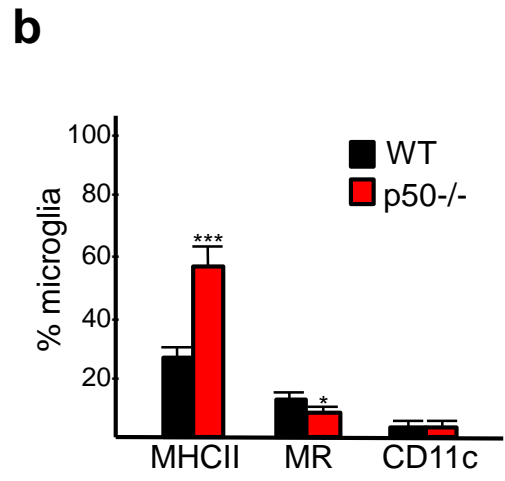

**Supplementary Fig. S2** Microglia from p50<sup>-/-</sup> glioma-bearing mice have increased MHCII and reduced MR expression. **a** Representative F4/80;MHCII, F4/80;MR, and F4/80;CD11c FC plots from CD45<sup>int</sup>CD11b<sup>int</sup> tumor microglia in WT and p50<sup>-/-</sup> recipients. **b** The proportion of microglia that express F4/80, MHCII, MR, or CD11c is quantified (mean, SE from four determinations).

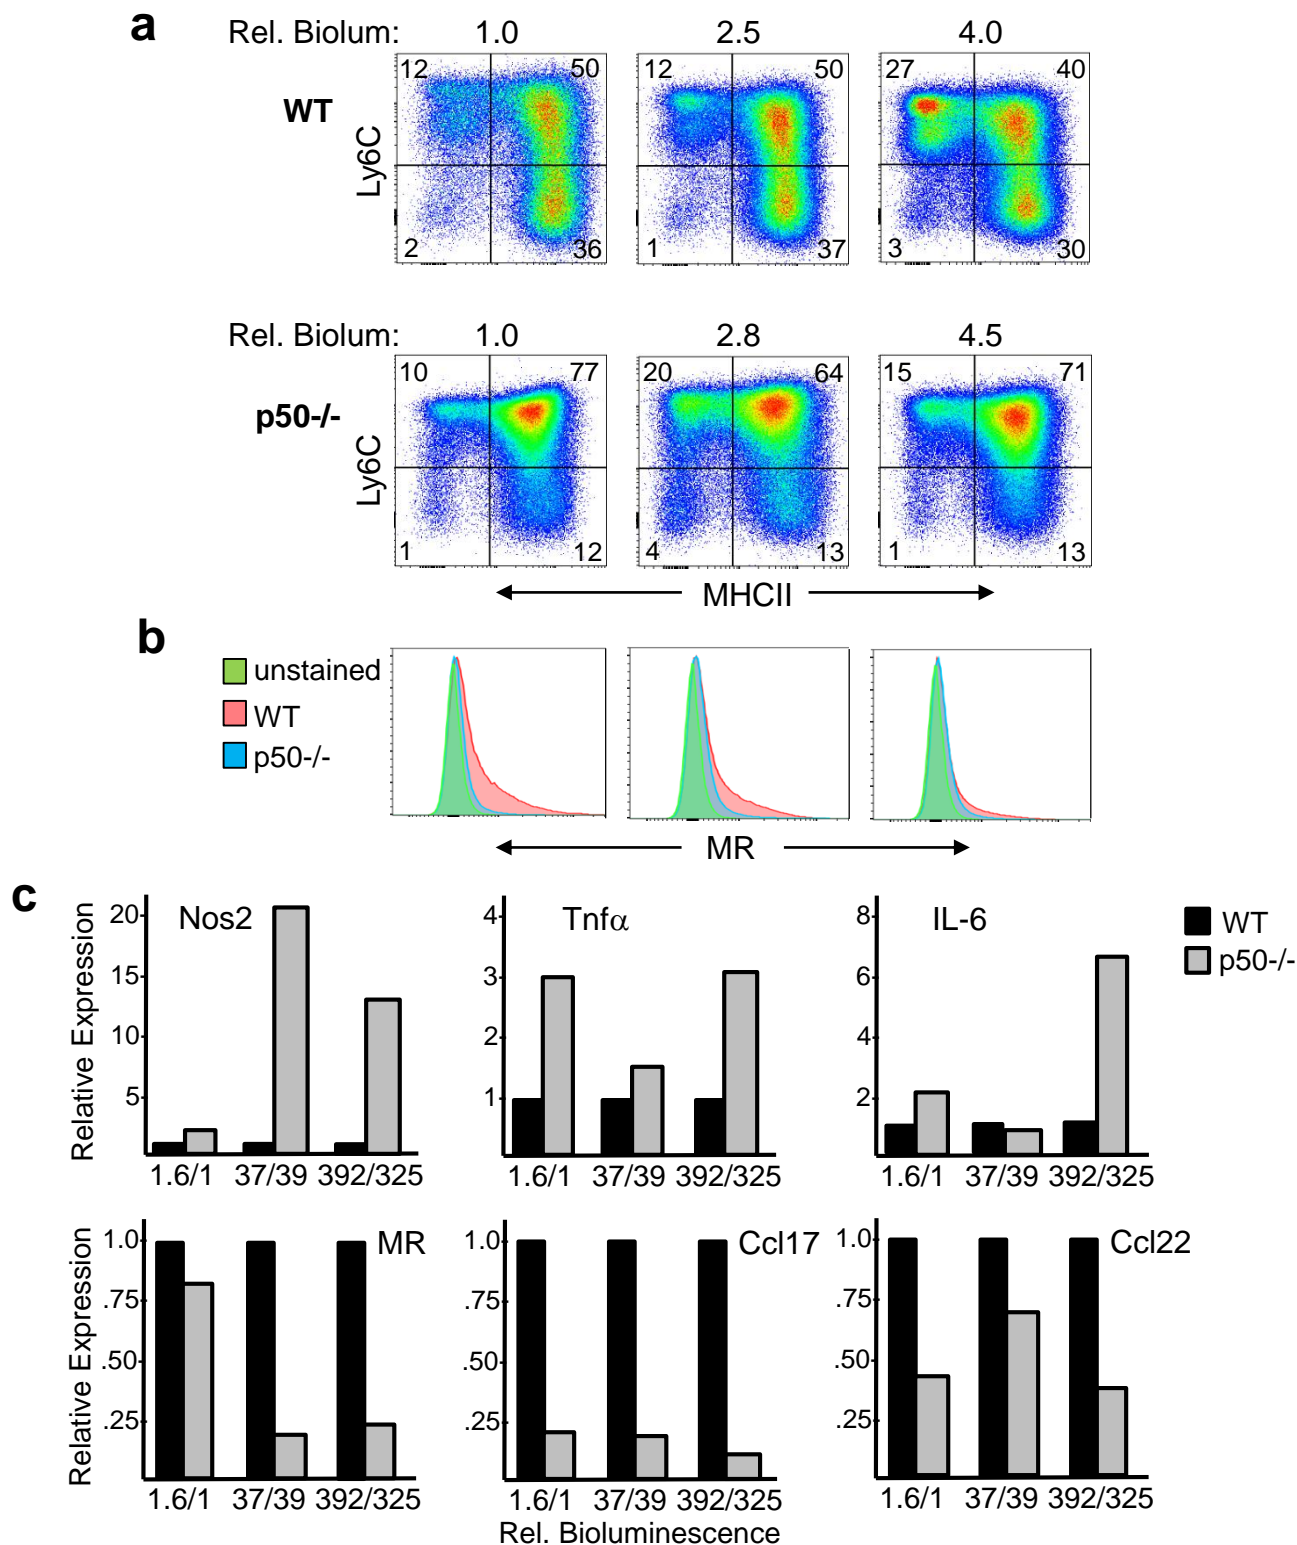

**Supplementary Fig. S3** Increased proportion of Ly6C<sup>int</sup>MHCII<sup>hi</sup> TIMs and tumor-myeloid cell M1 phenotype in p50<sup>-/-</sup> compared to WT mice in tumors of comparable size. **a** Ly6C;MHCII FC plots within the TIM gate for small, medium, and large GL261-Luc tumors forming in WT or p50<sup>-/-</sup> recipients. The relative bioluminescence signals obtained on day 13 and proportion of cells in each FC quadrant, analyzed after tumor isolation on day 14, are shown. **b** MR FC plots within the TIM gate for the same six tumors. **c** Relative expression of indicated mRNAs in CD11b<sup>+</sup> cells from tumors of different sizes on d14, with WT values set to 1.0 for each tumor.

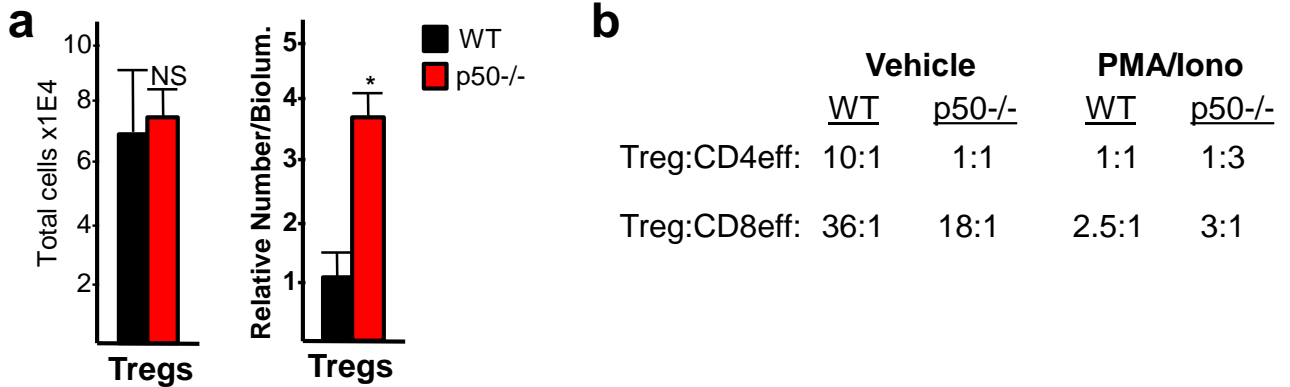

**Supplementary Fig. S4.** Increased Tregs per bioluminescence unit and Treg:Teffector ratios in p50<sup>-/-</sup> glioma recipients. **a** Foxp3<sup>+</sup>CD25<sup>+</sup> Tregs quantified as total number (left) or by the number per relative bioluminescence units (right, mean, SE from four determinations). **b** Ratios of Treg:CD4 effectors or Treg:CD8 IFN $\gamma$ <sup>+</sup> effectors, with effectors enumerated as IFN $\gamma$ <sup>+</sup> cells after 4 hrs in vehicle or PMA and ionomycin. Ratios were determined from mean values and rounded to nearest whole numbers.

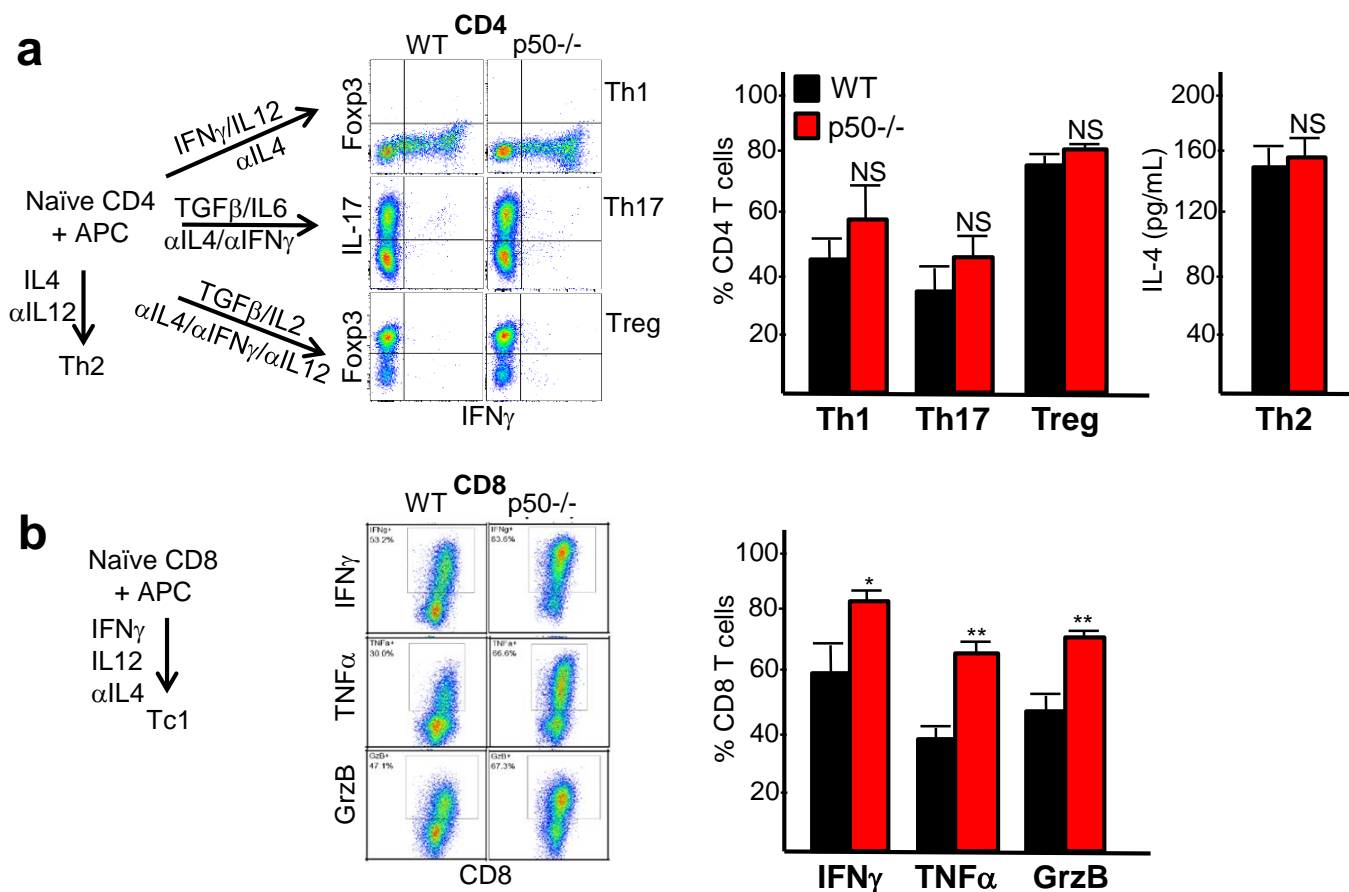

**Supplementary Fig. S5** Absence of NF- $\kappa$ B p50 does not alter naïve CD4 T cell lineage skewing but increases naïve CD8 T cell Tc1 formation. **a** Cytokines and cytokine antibodies ( $\alpha$ ) utilized for evaluation of the ability of naïve WT and p50<sup>-/-</sup> splenic CD4 T cells to be skewed toward the Th1, Th2, Th17, or Treg phenotypes (left), and representative FC plots for detecting IFN $\gamma$ <sup>+</sup> Th1 cells, IL-17<sup>+</sup> Th17 cells, and Foxp3<sup>+</sup> Tregs (center). After two days in indicated cytokines/antibodies plus growth stimulatory anti-CD3 (3 $\mu$ g/ml), Th1/Th2/Treg cultures were transferred to IL-2 and Th17 to IL-23 for four days, followed by 4 hr PMA/ionomycin stimulation and FC. The percent of CD4 cells that developed Th1, Th17, or Treg FC phenotypes or secretion of IL-4 as measured by ELISA indicative of the Th2 phenotype (right, mean and SE from three determinations).

**b** Cytokines utilized for evaluation of the ability of naïve splenic CD8 T cells to adopt the Tc1 phenotype (left) and representative FC plots for IFN $\gamma$ , TNF $\alpha$ , and GrzB expression among CD8<sup>+</sup> cells after stimulation (center). Quantification of IFN $\gamma$ <sup>+</sup>, GrzB<sup>+</sup>, and TNF $\alpha$ <sup>+</sup> cells as a percentage of CD8<sup>+</sup> cells (right, mean and SE from three determinations).

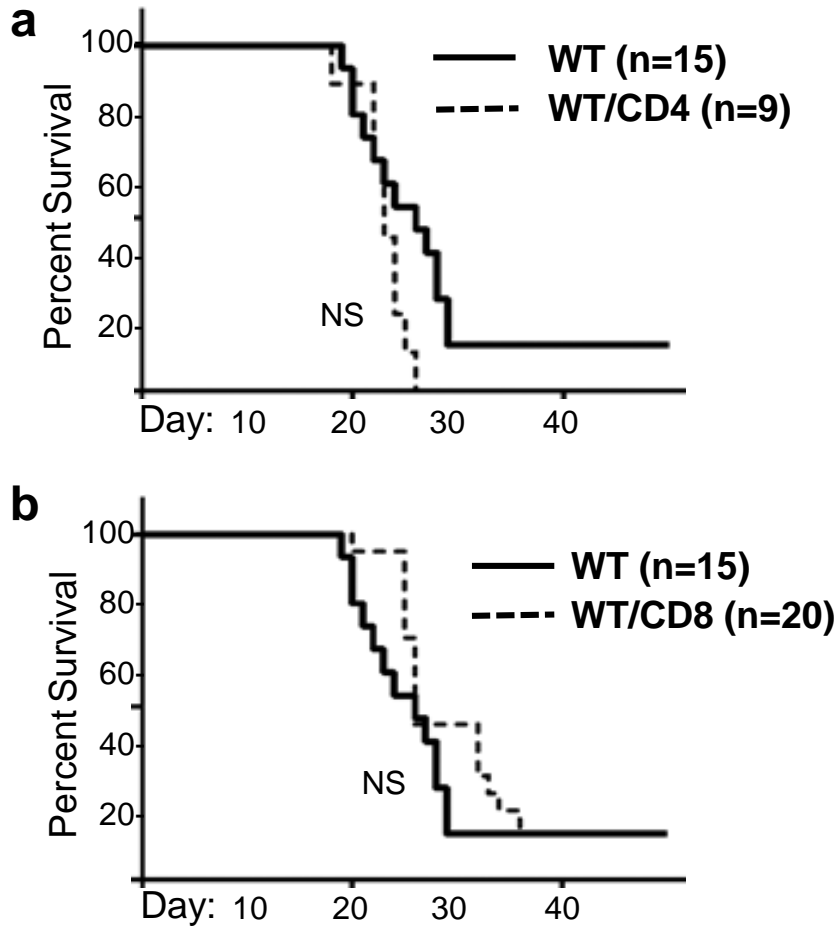

**Supplementary Fig. S6** CD4 or CD8 T cell depletion does not alter survival of WT glioma-bearing mice. **a, b** Survival curves for GL261-Luc cell-inoculated WT mice or WT mice exposed to CD4 or CD8 antibody (Ab) as diagramed in Fig. 6 are shown. The number of mice in each group and Log Rank p-values comparing the control and Ab-treated WT groups are also shown. The WT control mice are the same as those presented in Fig. 6 and were inoculated concurrently with those exposed to the T cell depleting reagents.
